# Supplementary material for: Calcineurin Gamma Catalytic Subunit PPP3CC Inhibition by miR-200c-3p Affects Apoptosis in Epithelial Ovarian Cancer
Source: Genes (Basel). 2021 Sep 10;12(9):1400. doi: 10.3390/genes12091400 (PMC8470066; doi:10.3390/genes12091400)
Supplement: Supplementary file 1 [file genes-12-01400-s001.zip › Supplementary tables S1 and S2.pdf]

## Supplementary Tables.

**Table S1:** List of the 11 genes selected as potential miR-200c-3p target genes through the anti-correlation estimated from CCLE and TCGA datasets

| Gene name | Correlation_CCLE *<br>( $\rho$ ) | Correlation_TCGA*<br>( $\rho$ ) | Tumor/Control_TCGA@<br>(fold change) |
|-----------|----------------------------------|---------------------------------|--------------------------------------|
| ZEB1      | -0.723448872721684               | -0.249055204950147              | 0.451243596169514                    |
| CRTAP     | -0.526981190255936               | -0.135253837528752              | 0.709721570516992                    |
| PMP22     | -0.587437170713167               | -0.284079942031707              | 0.500270380554825                    |
| PPP3CC    | -0.473697193956213               | -0.140368482737894              | 0.715175342230939                    |
| SAP30     | -0.543509096515572               | -0.233056808485156              | 0.866972274672618                    |
| SLC35B4   | -0.454422105218531               | -0.171975345071155              | 0.826747458105071                    |
| ST3GAL2   | -0.521956335025031               | -0.124821288012663              | 0.796238888540155                    |
| SYDE1     | -0.664158623770088               | -0.1652523847293                | 0.651303399918923                    |
| ZEB2      | -0.396237475798043               | -0.148200787981102              | 0.644807180881513                    |
| KDEL1     | -0.513429338182374               | -0.295403588202153              | 1.56545108565678                     |
| ZCCHC24   | -0.530558125192723               | -0.306491963265963              | 0.342374163192311                    |

\*Spearman Correlation coefficients ( $\rho$ ) reported in the second and third columns, @TargetScan predictions and differential expression between tumor and normal ovarian tissue samples from TCGA (fourth column: fold expression in tumors compared to normal tissues).

**Table S2:** Enrichment results applied to the list of the 11 genes selected as potential miR-200c-3p target genes using ConsensusPathDB annotations.

| Pathway*                                                             | Source       | Genes     |
|----------------------------------------------------------------------|--------------|-----------|
| Hypoxia-mediated EMT and Stemness                                    | Wikipathways | ZEB1      |
| TGF-beta Signaling Pathway                                           | Wikipathways | ZEB1;ZEB2 |
| Epithelial to mesenchymal transition in colorectal cancer            | Wikipathways | ZEB1;ZEB2 |
| sumoylation as a mechanism to modulate ctbp-dependent gene responses | BioCarta     | ZEB1      |
| Type I collagen synthesis in the context of Osteogenesis imperfecta  | Wikipathways | CRTAP     |
| Extracellular matrix organization                                    | Reactome     | CRTAP     |
| Collagen biosynthesis and modifying enzymes                          | Reactome     | CRTAP     |
| Collagen formation                                                   | Reactome     | CRTAP     |
| Neural Crest Differentiation                                         | Wikipathways | PMP22     |

|                                                                |          |         |
|----------------------------------------------------------------|----------|---------|
| Nervous system development                                     | Reactome | PMP22   |
| Developmental Biology                                          | Reactome | PMP22   |
| EGR2 and SOX10-mediated initiation of Schwann cell myelination | Reactome | PMP22   |
| Activation of BH3-only proteins                                | Reactome | PPP3CC  |
| Role of mef2d in t-cell apoptosis                              | BioCarta | PPP3CC  |
| Intrinsic Pathway for Apoptosis                                | Reactome | PPP3CC  |
| Programmed Cell Death                                          | Reactome | PPP3CC  |
| Epigenetic regulation of gene expression                       | Reactome | SAP30   |
| Epstein-Barr virus infection - Homo sapiens (human)            | KEGG     | SAP30   |
| Chromatin modifying enzymes                                    | Reactome | SAP30   |
| Chromatin organization                                         | Reactome | SAP30   |
| Proteoglycan biosynthesis                                      | EHMN     | SLC35B4 |
| Galactose metabolism                                           | EHMN     | SLC35B4 |
| Transport of vitamins, nucleosides, and related molecules      | EHMN     | SLC35B4 |
| SLC-mediated transmembrane transport                           | Reactome | SLC35B4 |
| Asparagine N-linked glycosylation                              | Reactome | ST3GAL2 |
| Metabolism of carbohydrates                                    | Reactome | ST3GAL2 |
| Post-translational protein modification                        | Reactome | ST3GAL2 |
| Metabolism of proteins                                         | Reactome | ST3GAL2 |
| RHOF GTPase cycle                                              | Reactome | SYDE1   |
| RHOQ GTPase cycle                                              | Reactome | SYDE1   |
| RAC2 GTPase cycle                                              | Reactome | SYDE1   |

|                                                                          |              |           |
|--------------------------------------------------------------------------|--------------|-----------|
| CDC42 GTPase cycle                                                       | Reactome     | SYDE1     |
| Mammary gland development pathway - Embryonic development (Stage 1 of 4) | Wikipathways | ZEB2      |
| TGF-beta Receptor Signaling                                              | Wikipathways | ZEB2      |
| TGF-beta receptor signaling in skeletal dysplasias                       | Wikipathways | ZEB2      |
| MicroRNAs in cancer - Homo sapiens (human)                               | KEGG         | ZEB1;ZEB2 |

\*The total number of annotated pathways were 153. Four annotated pathways were enlisted for each gene.
